# Supplementary material
Source: PubMed Central journal article supplement (PMC6096804)
Supplement: zjv017183808s6.pdf [file zjv017183808s6.pdf]

**Supplementary videos 1-5: Live cell imaging on infected neurons.** Surface HCoV-OC43 on (1-2) LA-N-5 and (3) PMNCs was sequentially immunostained with the anti-OC43 spike serum and appropriate secondary antibody then imaged by live cell imaging. Alternatively, LA-N-5 cells were stained with the non-neutralizing 3-2B.2 monoclonal antibody (4-5). Videos represent (1) 14 min, (2) 21 min, (3) 8 min, and (4-5) 35 min of real-time incubation at 0,125 frame/second. Video 1 is the same subfield presented in Figure 5D.
